# Supplementary material for: LGI2 Truncation Causes a Remitting Focal Epilepsy in Dogs
Source: PubMed Central journal article supplement (PMC3145619; doi:10.1371/journal.pgen.1002194), 2011-07-28

**A.**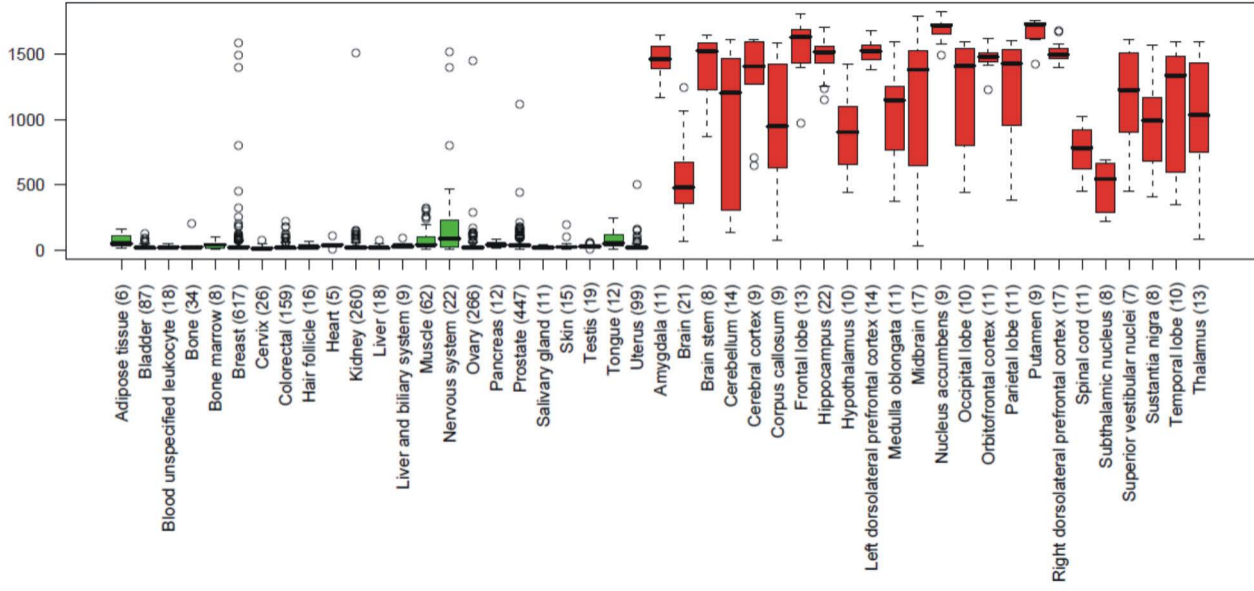

**B.**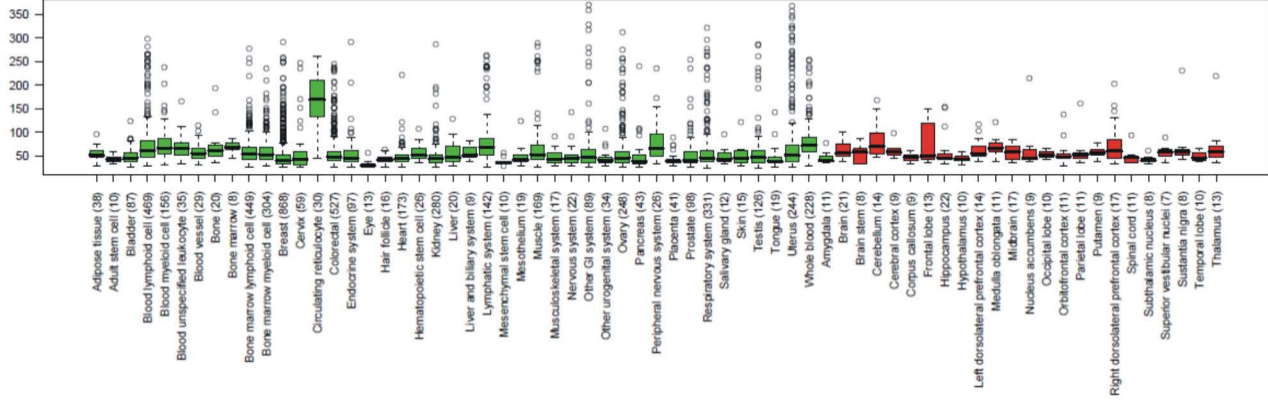

**C.**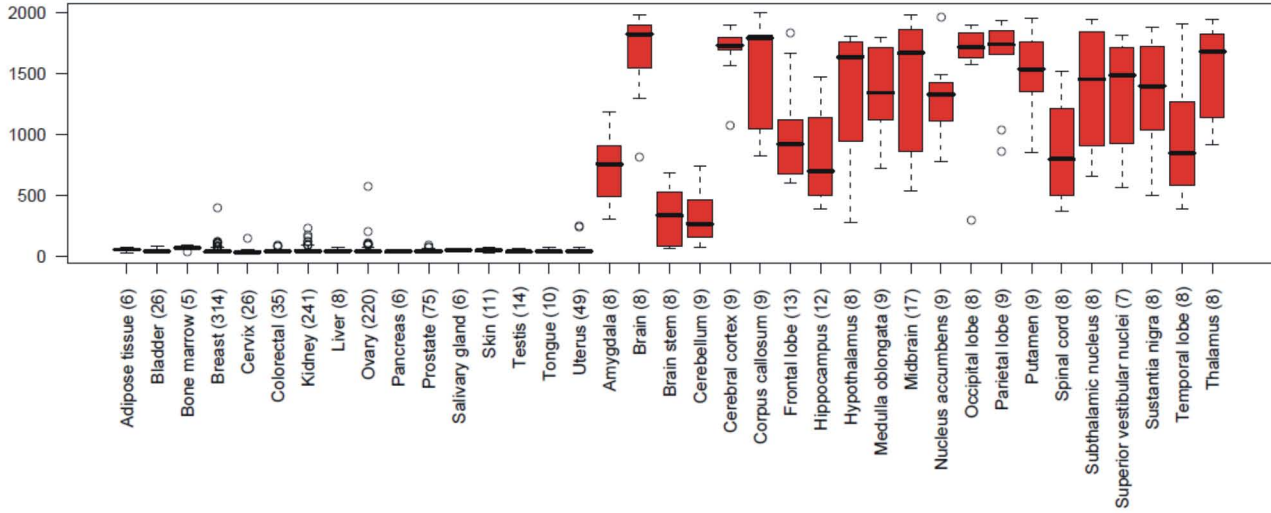

**D.**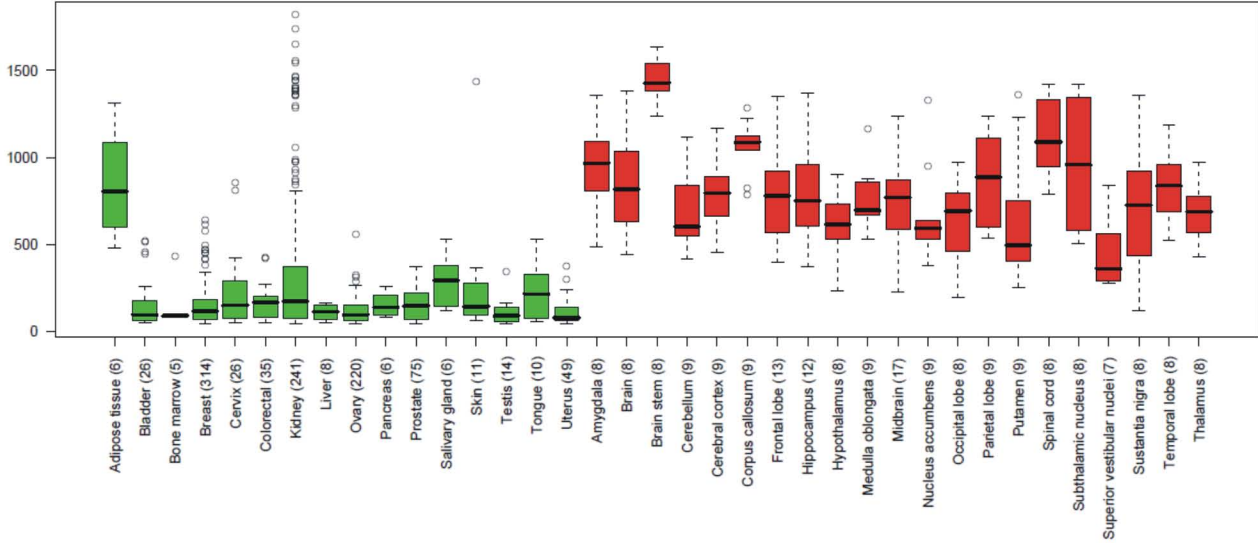

Supplement: pgen.1002194.s003.pdf [file pgen.1002194.s003.pdf]
